# Supplementary material
Source: PubMed Central journal article supplement (PMC4562434)
Supplement: NIHMS719863-supplement-1.pdf [file NIHMS719863-supplement-1.pdf]

# Effects of AKT Inhibition on HGF-mediated Erlotinib Resistance in Non-Small Cell Lung Cancer Cell Lines

Journal of Cancer Research and Clinical Oncology

William S. Holland, Danielle C. Chinn, Primo N. Lara Jr, David R. Gandara and Philip C. Mack  
University of California, Davis, Comprehensive Cancer Center, Sacramento, CA, 95817.

**Correspondence to:** Philip C. Mack, PhD, Associate  
Adjunct Professor

UC Davis Cancer Center  
4501 X Street, Suite 3016  
Sacramento, CA 95817

Voice 916 734 3771

Fax 916 734 7946

Email: [pcmack@ucdavis.edu](mailto:pcmack@ucdavis.edu)

**Online Resource 1** Growth curves of combination MK-2206 (fixed dose of 0.5  $\mu\text{M}$ ) and erlotinib (increasing doses) in NSCLC cell lines. Cells were treated for 72hrs prior to MTT.

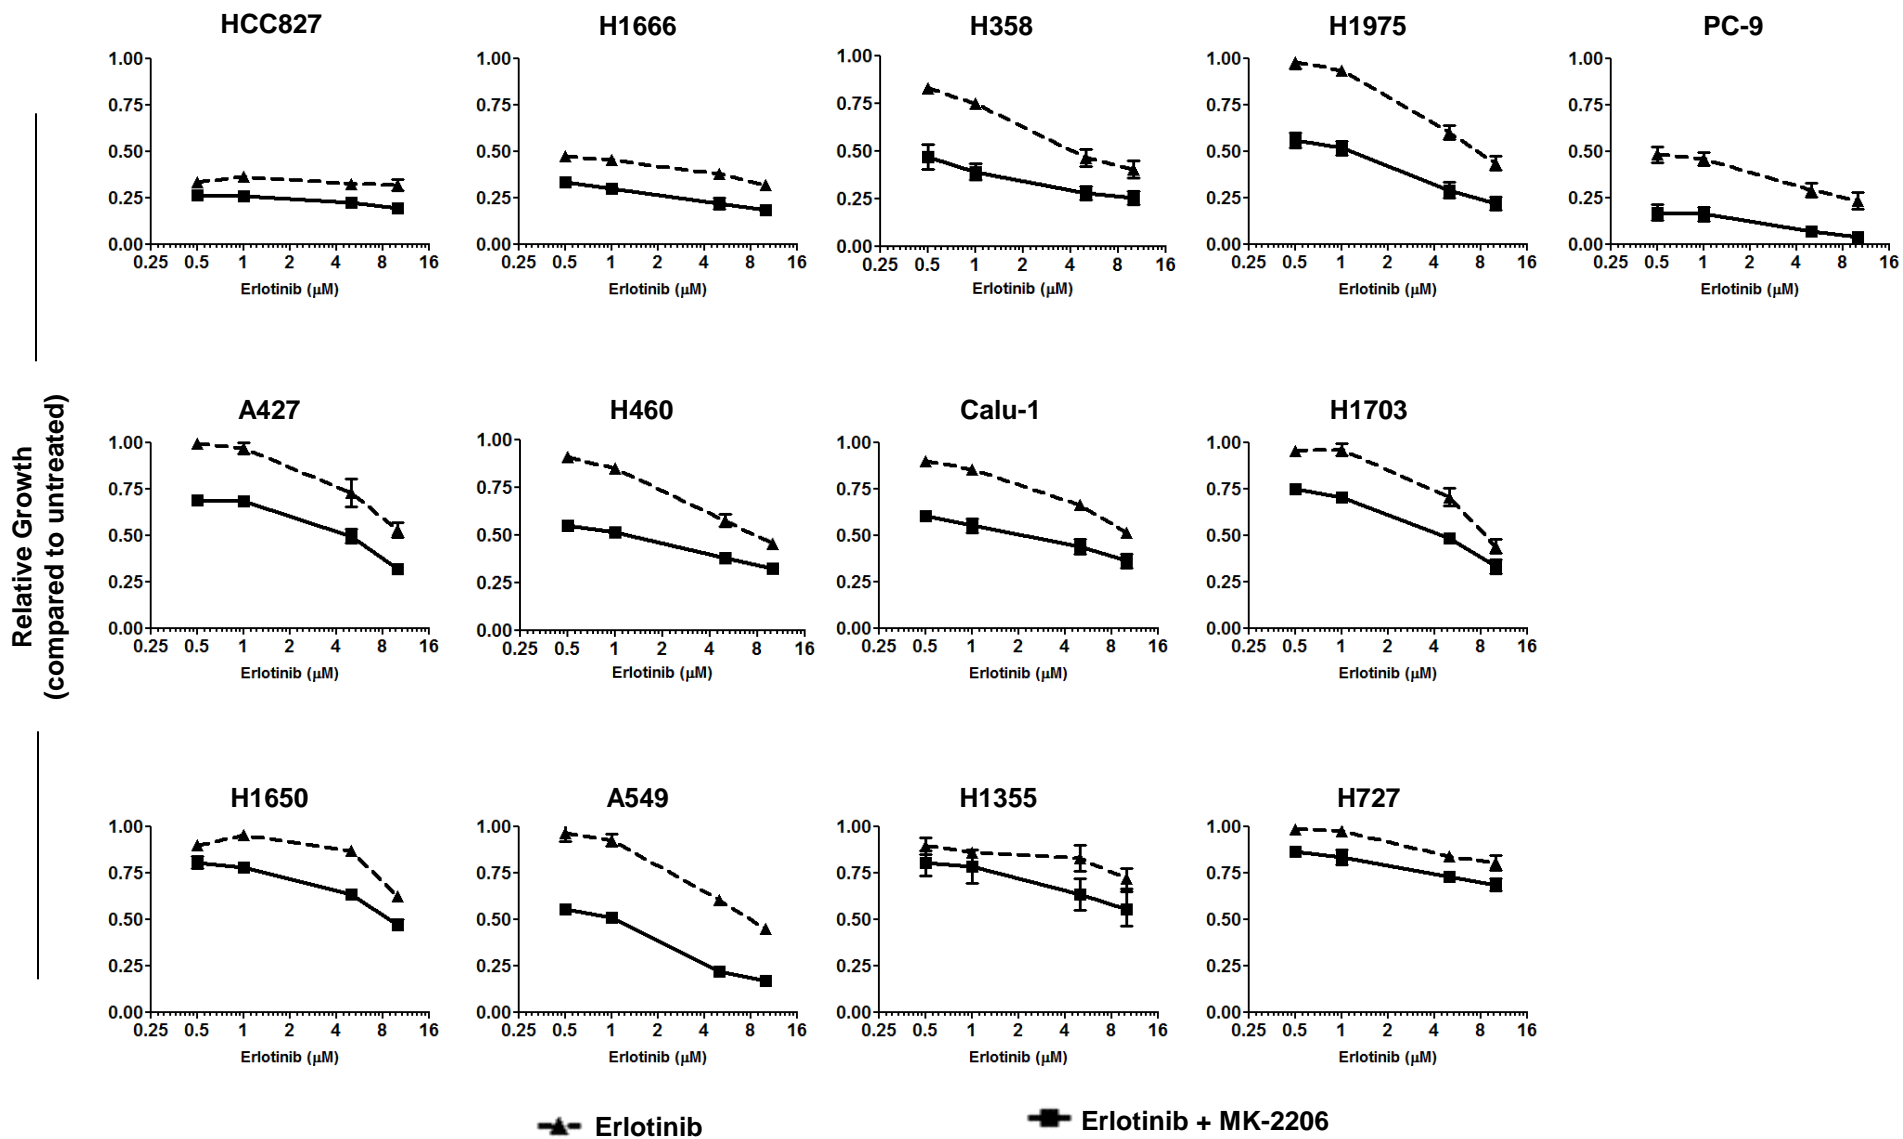

**Online Resource 2** Fa-CI plot of combination index (CI) of erlotinib plus MK-2206 for NSCLC cell lines by mutation type. Three combination effects were modeled using 1:1 fixed doses of both agents at 0.5, 2.5, and 5.0  $\mu$ M concentrations. Graphs show CI values plotted on the y-axis versus the combination effect (e.g. ED<sub>50</sub>) on the x-axis. The dotted line indicates a CI value of 1. CI values plotted >1 show drug antagonism, =1 show drug additivity and <1 show drug synergy. The three plotted asterisks indicate the experimentally derived effect observed following combination treatment. \*Dose effects for H1650 and H1355 do not reach an ED<sub>50</sub> for either single agent treatments or the combination.

**EGFR / KRAS wt**

**EGFR Mutant**

**KRAS Mutant**

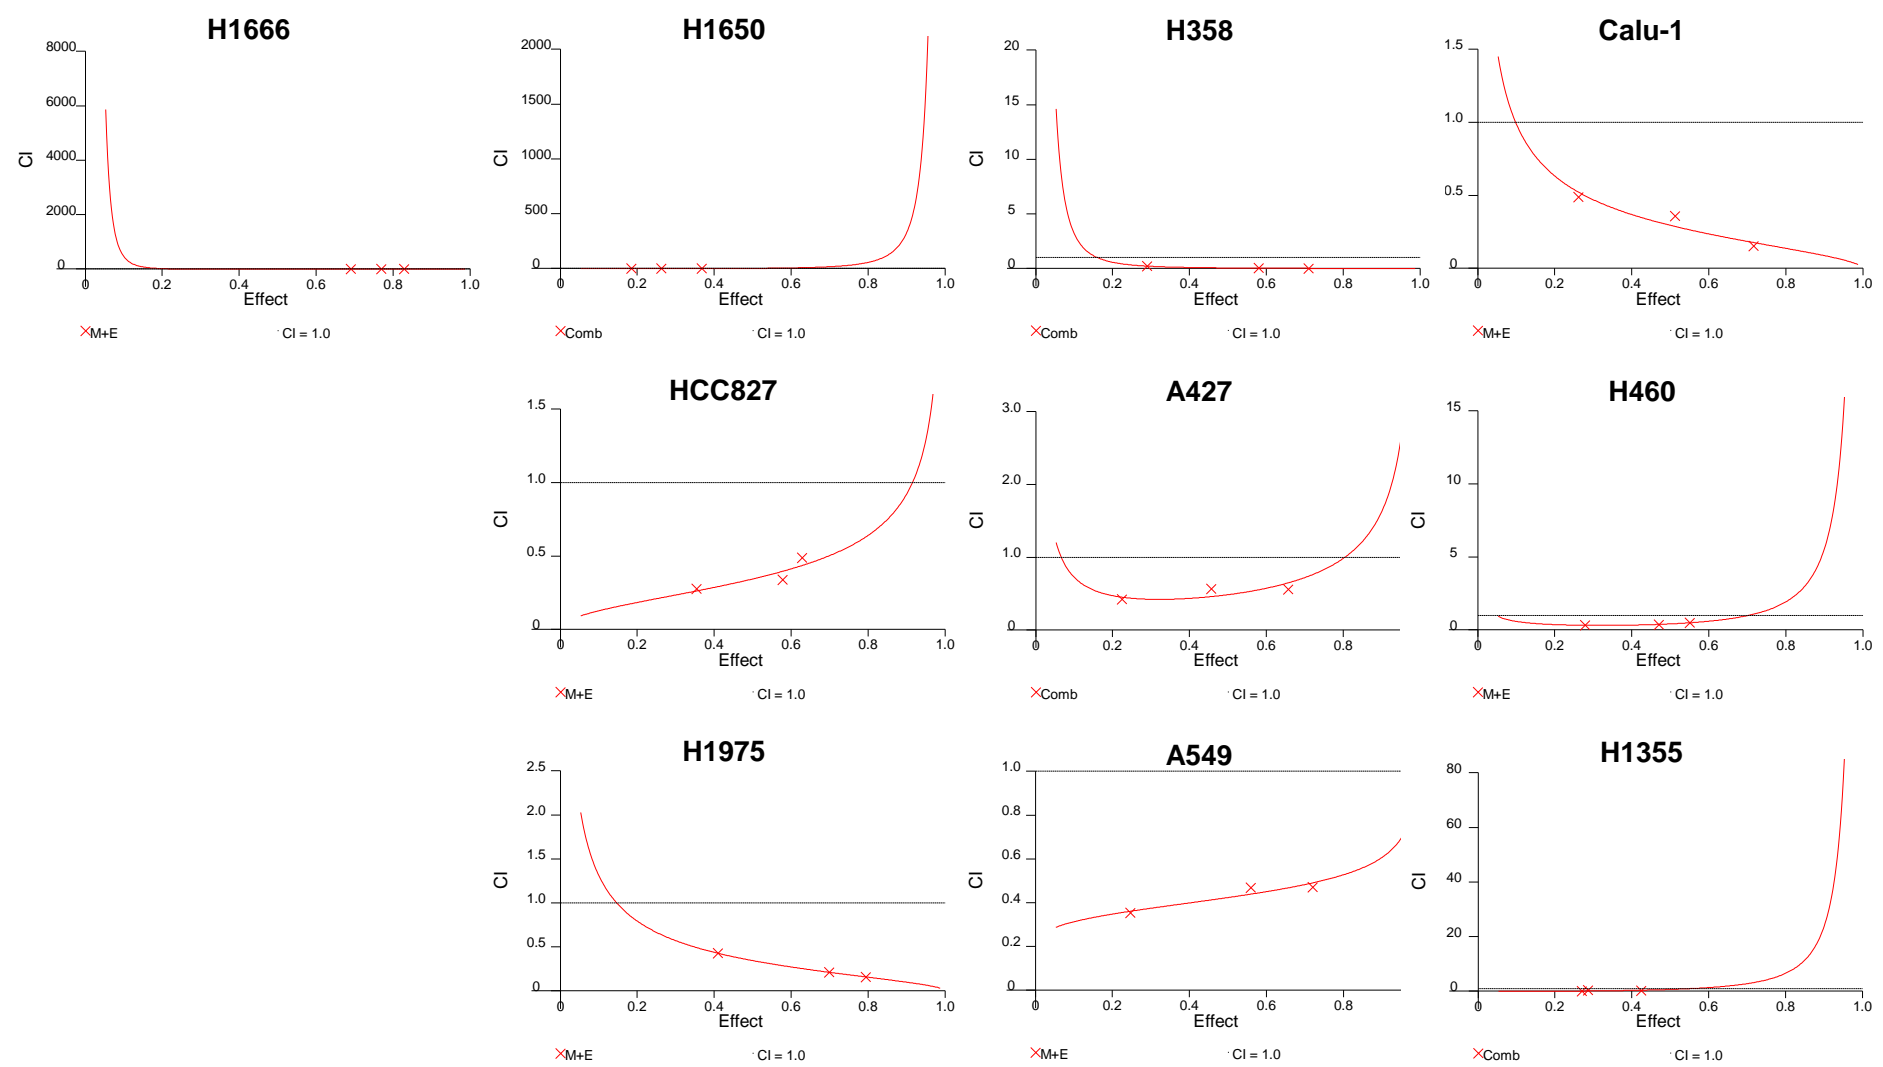

**Online Resource 3** Growth response of H1975 and H358 cell line models following 72 hrs of treatment with a higher dose of erlotinib (E) at 2.5  $\mu$ M MK-2206 (M) at 0.5  $\mu$ M, HGF at 50 ng/ $\mu$ l, and/or PHA-665752 (PHA) at 0.5  $\mu$ M using the CellTiter-Fluor Cell Viability Assay. Data is graphed as % growth relative to untreated cells. A (+) indicates addition of HGF or PHA while a (-) indicates it is not included

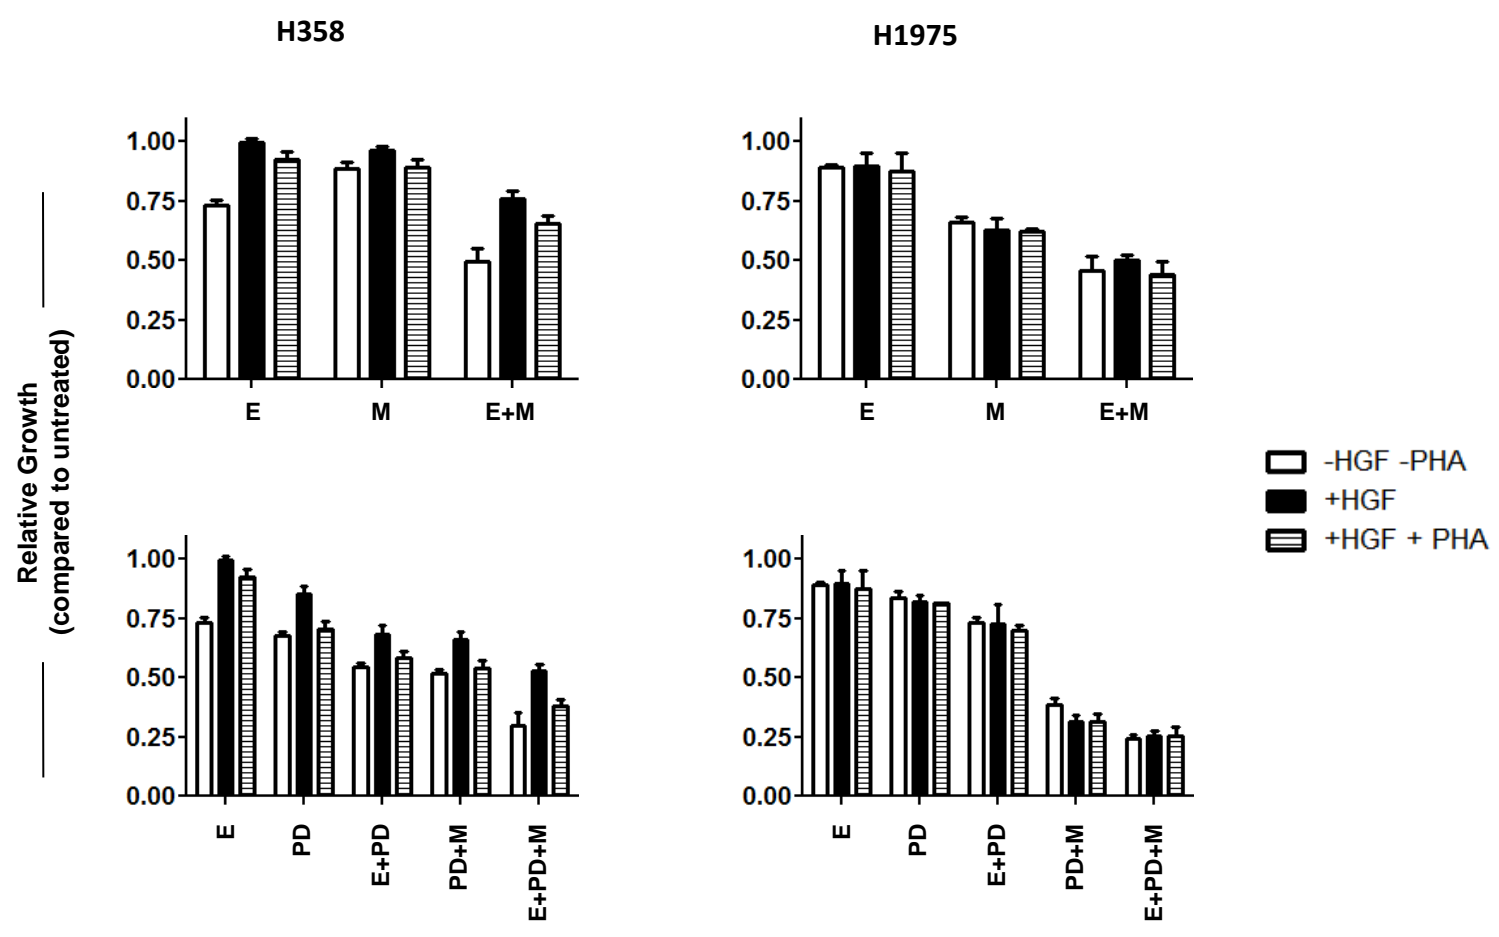

**Online Resource 4** Cell cycling effects of MK-2206 on erlotinib treated cells with and without HGF. All cells were treated for 24 hrs with a vehicle control (<0.1% DMSO), erlotinib (0.05  $\mu$ M for HCC827, 0.5  $\mu$ M for H1666, and 2.5  $\mu$ M for H1975 and H358), MK-2206 (0.5  $\mu$ M), HGF (0.05  $\mu$ g/ml) and/or PHA665752 (0.5  $\mu$ M) as indicated. Following treatment, cells were stained with propidium iodide and analyzed by flow cytometry. All treatments were repeated in triplicate.

**HCC827**

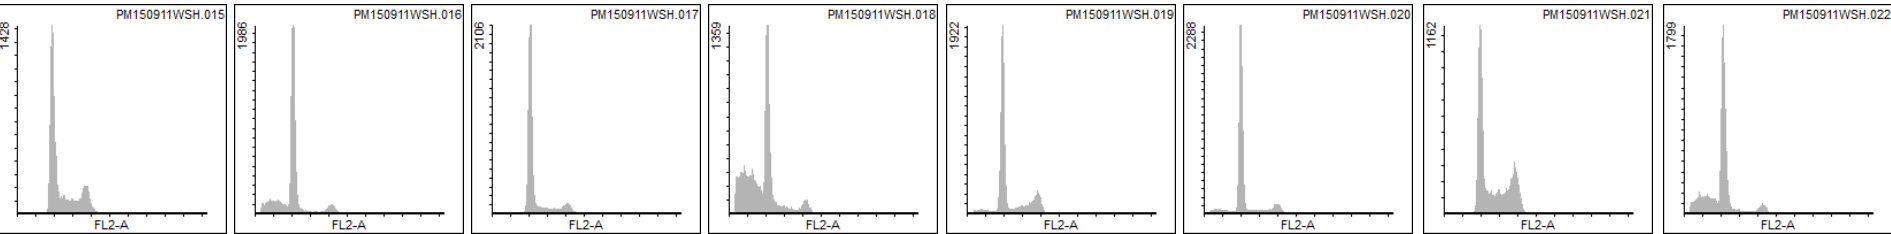

**H358**

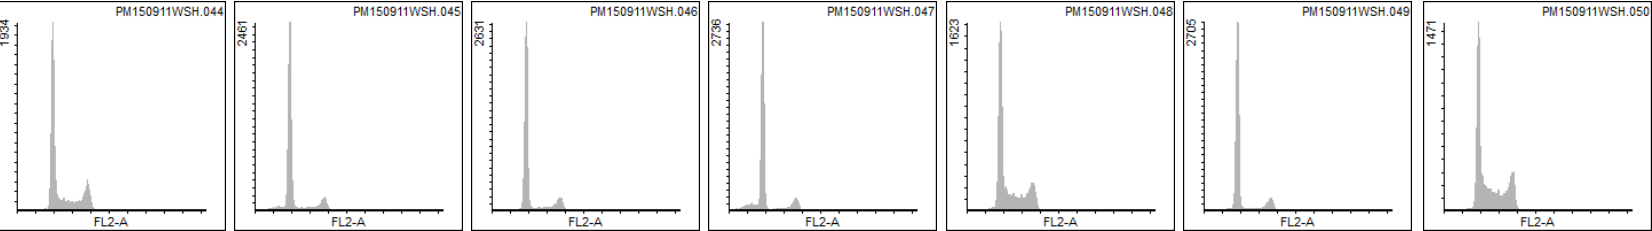

**H1975**

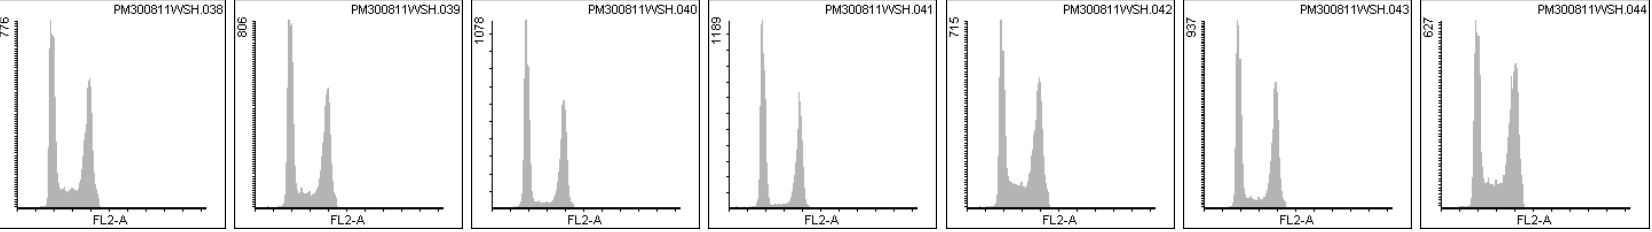

**H1666**

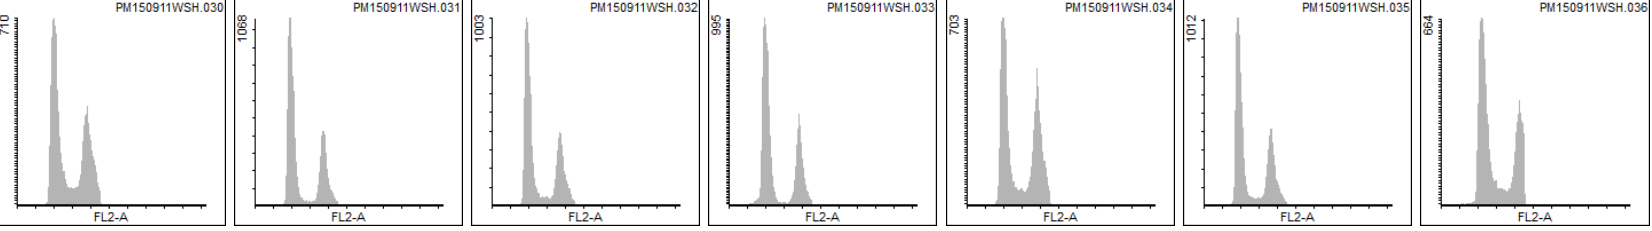

**Vehicle**      **Erlotinib**      **MK-2206**      **MK-2206 + Erlotinib**      **Erlotinib + HGF**      **MK-2206 + Erlotinib + HGF**      **HGF**      **Erlotinib + HGF + PHA665752**

**Online Resource 5** Change in cell cycle distribution of MK-2206-treated cells with and without HGF. All cells were treated for 24 hrs with vehicle control (Veh) (<0.1% DMSO), erlotinib (E) (0.05  $\mu$ M for HCC827, 0.5  $\mu$ M for H1666, and 2.5  $\mu$ M for H1975 and H358), MK-2206 (M) (0.5  $\mu$ M), and HGF (0.05  $\mu$ g/ml) as indicated. Following treatment, cells were stained with propidium iodide and analyzed by flow cytometry. Each treatment represents data collected from three independent experiments.

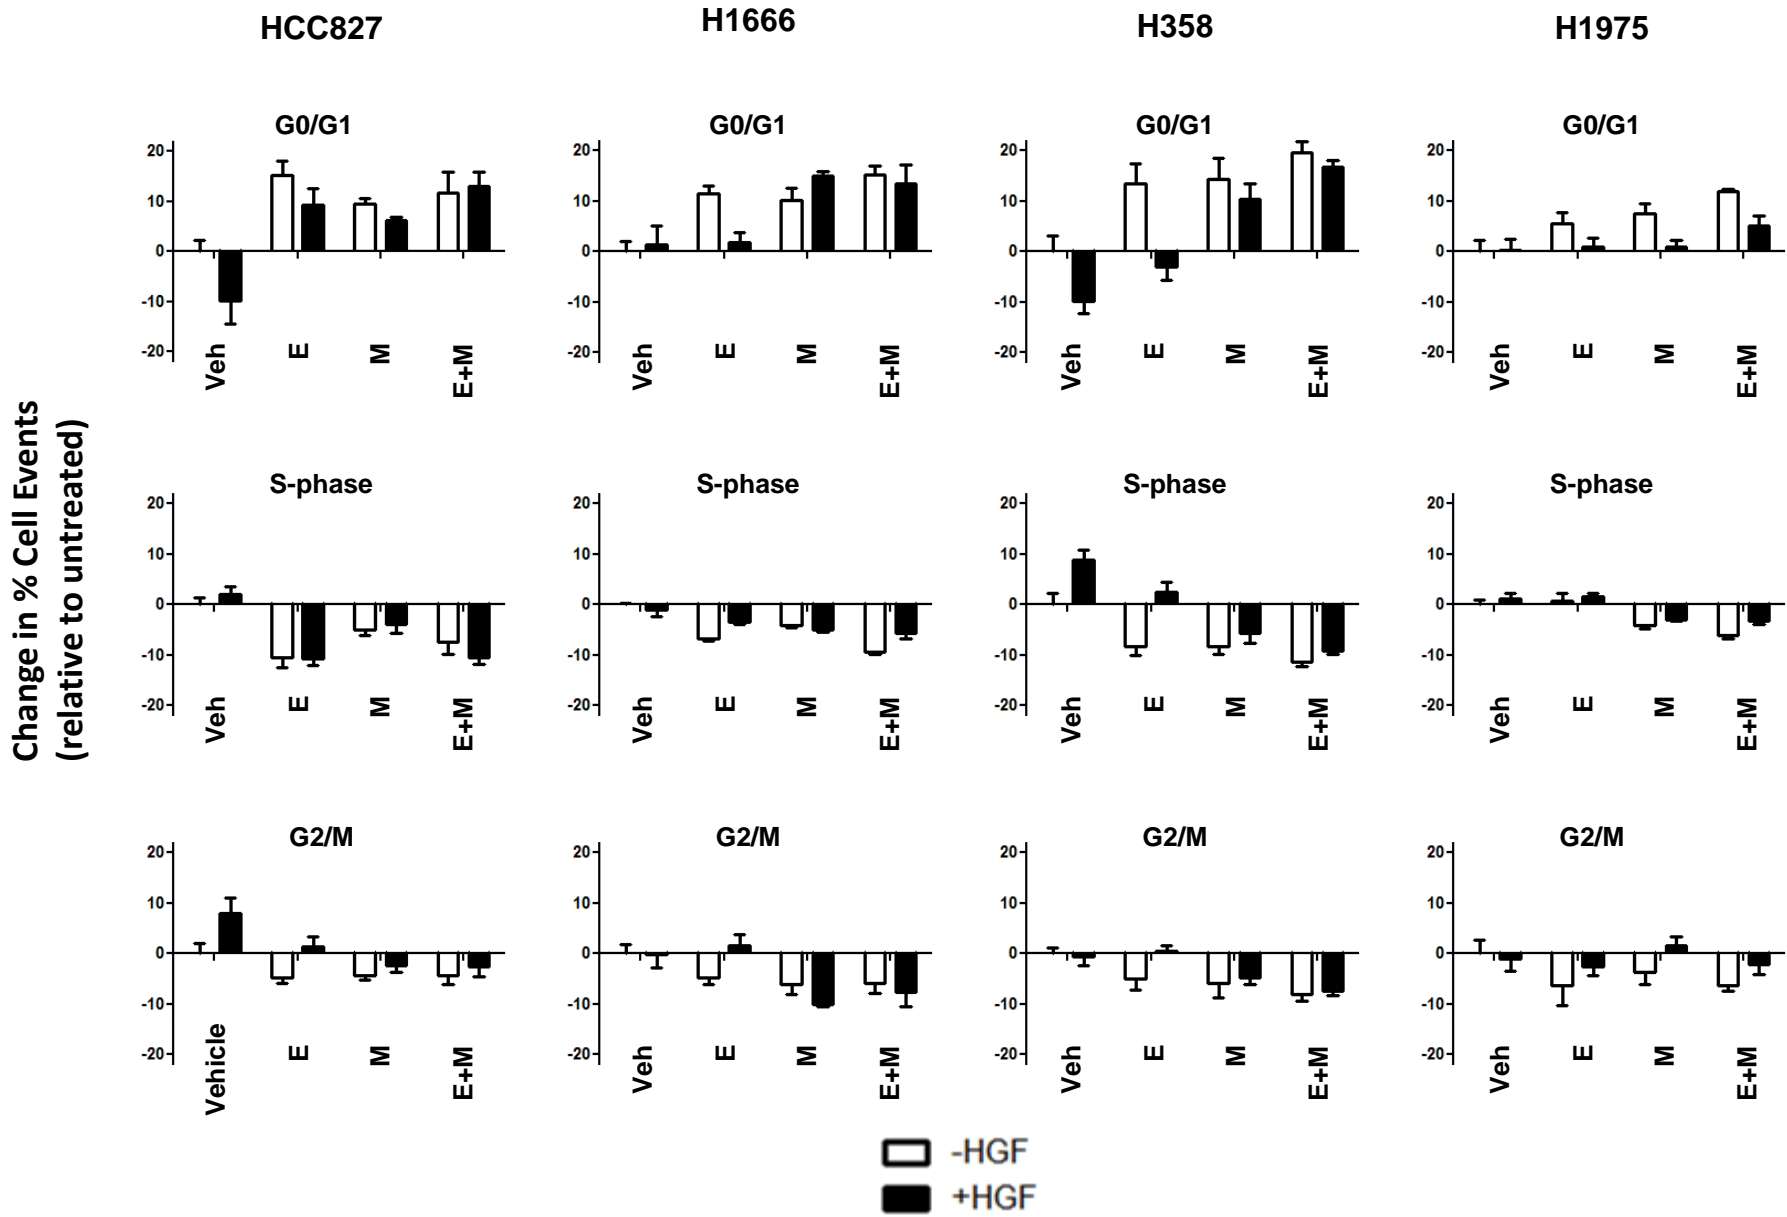

**Online Resource 6** Sub-G1 fractionation of erlotinib (E) plus MK-2206 (M) in NSCLC cell lines with or without HGF (H) or PHA665752 (PHA). All cells were treated for 24 hrs with a vehicle control (<0.1% DMSO), E (0.05  $\mu$ M for HCC827, 0.5  $\mu$ M for H1666, and 2.5  $\mu$ M for H1975 and H358), M (0.5  $\mu$ M), HGF (0.05  $\mu$ g/ml) and/or PHA (0.5  $\mu$ M) as indicated.

**A**

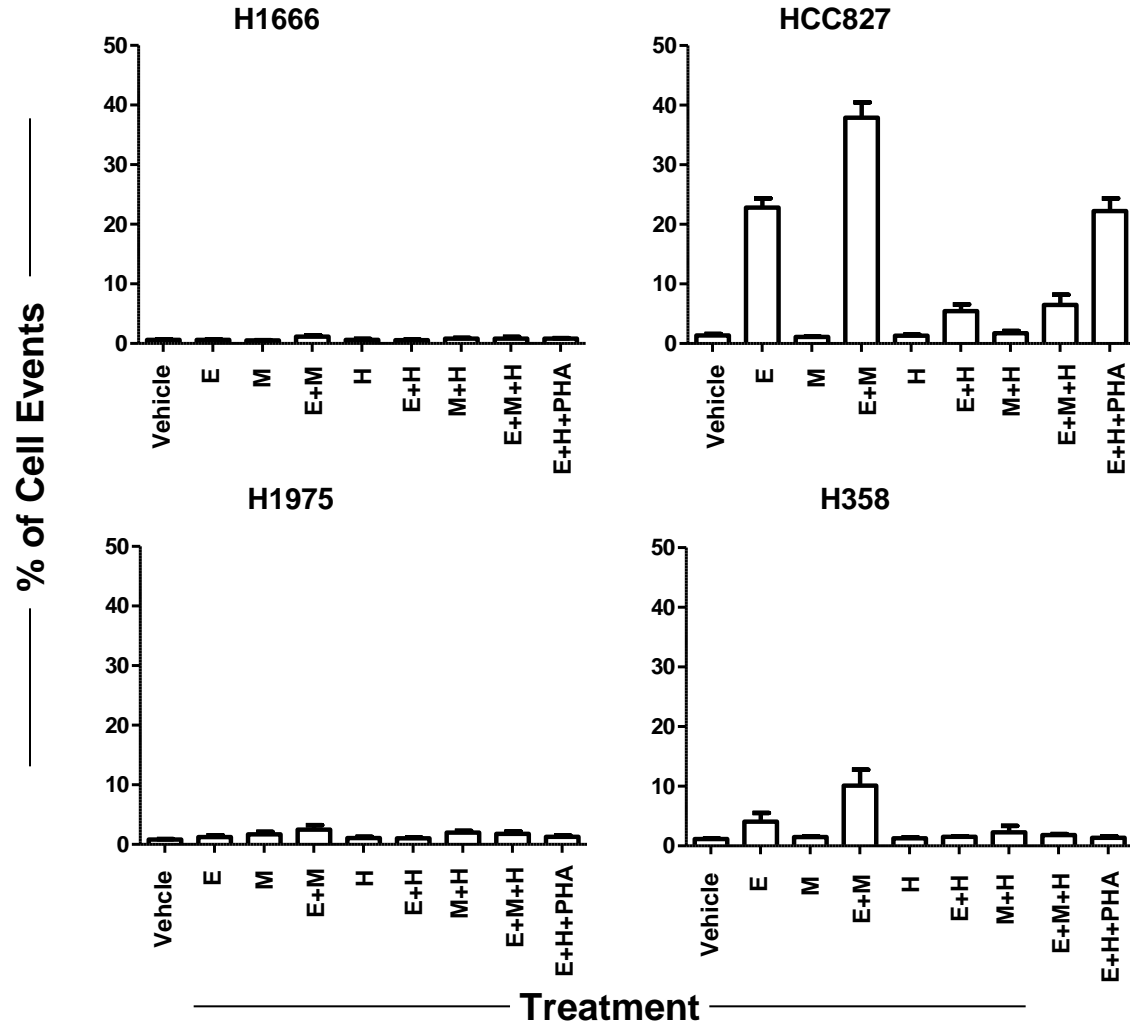

**Online Resource 7** Immunoblotting analysis of phospho- and total MET in HCC827 following 24 hrs of treatment with erlotinib (0.05 μM), MK-2206 (0.5 μM), PD0325901 (0.5 μM) as single agents and in combination in NSCLC cell lines with or without HGF (0.05 μg/ml) and PHA665752 (0.5 μM).

**HCC827**

|                   | 1 | 2 | 3 | 4 | 5 | 6 | 7 | 8 | 9 | 10 | 11 | 12 | 13 | 14 |
|-------------------|---|---|---|---|---|---|---|---|---|----|----|----|----|----|
| <b>Erlotinib</b>  | - | + | + | + | + | - | + | + | + | +  | +  | +  | -  | -  |
| <b>MK-2206</b>    | - | - | + | - | + | + | - | - | + | -  | +  | +  | +  | +  |
| <b>PD0325901</b>  | - | - | - | + | + | + | - | - | - | +  | +  | +  | +  | +  |
| <b>HGF</b>        | - | - | - | - | - | - | + | + | + | +  | +  | +  | +  | +  |
| <b>PHA-665752</b> | - | - | - | - | - | - | - | + | - | -  | -  | +  | -  | +  |
| <b>pMET</b>       |   |   |   |   |   |   |   |   |   |    |    |    |    |    |
| <b>Total Met</b>  |   |   |   |   |   |   |   |   |   |    |    |    |    |    |
